# Supplementary material for: Detecting, quantifying, and discriminating the mechanism of mosaic chromosomal aneuploidies using MAD-seq
Source: HighWire-hosted journal article supplement (doi:10.1101/gr.226282.117), 2018-05-17
Supplement: Supplemental_Table_S2.xlsx [file Supplemental_Table_S2.xlsx]

## Sheet: Table S2
ID	Population	Super Population	Sex	DNA source	Type of aneuploidy	Fraction of aneuploid cells	Chromosome	Start Position	End Position	Institution	Depth for Heterozygous Sites
HG00110	GBR	European	Female	LCL	LOH	0.2765	chr5	126792974	180430895	BGI	99
HG00141	GBR	European	Male	LCL	LOH	0.2182	chr22	18905964	24226242	BCM	63
HG00142	GBR	European	Male	LCL	Mitotic Trisomy	0.393	chr11	NA	NA	BCM	78	Figure S6a
					Mitotic Trisomy	0.314	chr13	NA	NA
HG00154	GBR	European	Female	LCL	Monosomy	0.5933	chrX	NA	NA	BGI	102
HG00280	FIN	European	Male	LCL	LOH	0.1501	chr6	576902	41196605	BGI	97
HG00281	FIN	European	Female	LCL	LOH	0.463	chr7	780980	44579180	BGI	88
HG00361	FIN	European	Female	LCL	Monosomy	0.7204	chrX	NA	NA	BI	87
HG00501	CHS	East Asian	Female	LCL	Mitotic Trisomy	0.35	chr12	NA	NA	BGI	72
HG00623	CHS	East Asian	Female	LCL	Mitotic Trisomy	0.539	chr12	NA	NA	BI	64
HG01085	PUR	Admixed American	Male	LCL	LOH	0.468	chr22	19751829	25715886	BGI	109
HG01137	CLM	Admixed American	Female	LCL	Monosomy	0.3631	chrX	NA	NA	BCM	60	Figure S6b
					Mitotic Trisomy	0.164	chr12	NA	NA
HG01357	CLM	African	Female	LCL	Mitotic Trisomy	0.486	chr12	NA	NA	BCM	51
HG01366	CLM	Admixed American	Female	LCL	Monosomy	0.5641	chrX	NA	NA	BGI	81
HG01506	IBS	European	Male	LCL	Mitotic Trisomy	0.165	chr11	NA	NA	BGI	93	Figure S6c
HG01512	IBS	European	Male	LCL	LOH	0.1964	chr17	3953102	20799119	BGI	84
HG01602	IBS	European	Female	LCL	Mitotic Trisomy	0.471	chr9	NA	NA	BCM	66
HG01702	IBS	European	Female	LCL	Mitotic Trisomy	0.105	chr12	NA	NA	BGI	106	Figure S6d
HG01939	PEL	Admixed American	Female	LCL	LOH	0.415	chr9	117371	71114312	BI	94	Figure S6e
					LOH	0.177	chr22	19906511	25145471
HG01983	PEL	Admixed American	Female	LCL	Mitotic Trisomy	0.177	chr12	NA	NA	BGI	88
HG02322	ACB	African	Female	LCL	Mitotic Trisomy	0.728	chr12	NA	NA	BI	67
HG02397	CDX	East Asian	Male	LCL	LOH	0.308	chr12	274839	40657700	BGI	101
HG02485	ACB	African	Female	LCL	Mitotic Trisomy	0.089	chr12	NA	NA	BCM	45
HG02634	GWD	African	Male	LCL	Mitotic Trisomy	0.206	chr11	NA	NA	BI	81
HG02805	GWD	African	Female	LCL	Mitotic Trisomy	0.528	chrX	NA	NA	BI	43
HG02816	GWD	African	Male	LCL	LOH	0.1788	chr22	19213033	25601196	BGI	114
HG02852	GWD	African	Female	LCL	LOH	0.267	chr21	16340405	46393090	BGI	116
HG02878	GWD	African	Male	LCL	LOH	0.2023	chr22	19467652	26342144	BGI	73
HG02887	GWD	African	Male	LCL	LOH	0.649	chr19	36583692	59067623	BGI	103
HG03055	MSL	African	Female	LCL	Monosomy	0.3968	chrX	NA	NA	BGI	127
HG03061	MSL	African	Female	LCL	LOH	0.32	chr3	133667507	197807241	BGI	75
HG03086	MSL	African	Female	LCL	LOH	0.327	chr8	97245368	146067054	BGI	39
HG03103	ESN	African	Male	LCL	LOH	0.734	chr18	54354239	77513721	BGI	107
HG03209	MSL	African	Male	LCL	LOH	0.232	chr22	30125023	51117580	BGI	96
HG03363	ESN	African	Female	LCL	LOH	0.2727	chr11	224048	40137543	WUGSC	46
HG03401	MSL	African	Female	LCL	Monosomy	0.2666	chrX	NA	NA	BGI	72
HG03511	ESN	African	Female	LCL	Monosomy	0.7906	chrX	NA	NA	WUGSC	55
HG03517	ESN	African	Female	LCL	Monosomy	0.1565	chrX	NA	NA	WUGSC	54
HG03593	BEB	South Asian	Male	LCL	LOH	0.1743	chr7	810219	38402517	BI	56
HG03922	BEB	South Asian	Female	LCL	LOH	0.419	chr22	21842655	29621128	BGI	111
HG03940	BEB	South Asian	Female	LCL	Mitotic Trisomy	0.146	chr12	NA	NA	BGI	111
HG04194	BEB	South Asian	Male	LCL	LOH	0.1279	chr1	120496119	226924196	BGI	108
NA06984	CEU	European	Male	LCL	LOH	0.2995	chr14	78285474	105222037	BI	42
NA06985	CEU	European	Female	LCL	Mitotic Trisomy	0.178	chr15	NA	NA	BCM	53
NA12156	CEU	European	Female	LCL	Mitotic Trisomy	0.253	chr9	NA	NA	BCM	37
NA12341	CEU	European	Female	LCL	LOH	0.2268	chr14	77745193	105356137	BI	37
NA12414	CEU	European	Female	LCL	LOH	0.593	chr19	281383	15300069	BCM	77
NA12763	CEU	European	Female	LCL	LOH	0.362	chr21	35896032	47961634	WUGSC	59
NA12889	CEU	European	Male	LCL	LOH	0.587	chr11	95512060	134188542	BI	152
NA18502	YRI	African	Female	LCL	Mitotic Trisomy	0.096	chr19	NA	NA	BCM	69
NA18520	YRI	African	Female	LCL	Monosomy	0.5762	chrX	NA	NA	BI	96
NA18573	CHB	East Asian	Female	LCL	LOH	0.2211	chr15	58476281	101109677	BGI	82
NA18864	YRI	African	Female	LCL	Monosomy	0.3367	chrX	NA	NA	BGI	101
NA18924	YRI	African	Female	LCL	Mitotic Trisomy	0.132	chr11	NA	NA	WUGSC	72
NA18946	JPT	East Asian	Female	LCL	Mitotic Trisomy	0.3047	chrX	NA	NA	BCM	63
NA18963	JPT	East Asian	Female	LCL	Monosomy	0.2055	chrX	NA	NA	BCM	75
NA18978	JPT	East Asian	Female	LCL	Monosomy	0.226	chrX	NA	NA	BCM	63
NA18981	JPT	East Asian	Female	LCL	LOH	0.47	chr22	20102750	24964128	WUGSC	71
NA19036	LWK	African	Female	LCL	LOH	0.184	chr7	64168575	158827326	BCM	57
NA19054	JPT	East Asian	Female	LCL	Monosomy	0.468	chrX	NA	NA	BI	59
NA19222	YRI	African	Female	LCL	Mitotic Trisomy	0.157	chr2	NA	NA	BCM	38
					Mitotic Trisomy	0.205	chr11	NA	NA
NA19225	YRI	African	Female	LCL	LOH	0.2157	chr10	93870839	135373679	BGI	108
NA19239	YRI	African	Male	LCL	Monosomy	0.042	chr4	NA	NA	WUGSC	49	Figure S6f
NA19332	LWK	African	Female	LCL	Monosomy	0.5914	chrX	NA	NA	BI	89
NA19355	LWK	African	Female	LCL	LOH	0.1725	chr2	89278489	10133284	BCM	62
NA19378	LWK	African	Female	LCL	Mitotic Trisomy	0.189	chr12	NA	NA	BI	66
NA19454	LWK	African	Male	LCL	LOH	0.27	chr20	239881	25438952	BI	61
NA19462	LWK	African	Female	LCL	LOH	0.649	chr1	879381	38049552	BCM	47
NA19788	MXL	Admixed American	Female	LCL	LOH	0.1791	chr9	97062981	139697259	WUGSC	57
NA20282	ASW	African	Female	LCL	LOH	0.614	chr3	142403242	197712759	WUGSC	66
NA20506	TSI	European	Female	LCL	Monosomy	0.7462	chrX	NA	NA	BCM	47
NA20530	TSI	European	Female	LCL	Monosomy	0.7989	chrX	NA	NA	BCM	44
NA20533	TSI	European	Female	LCL	LOH	0.3145	chr13	53617309	114780648	BCM	54	Figure S6g
					LOH	0.579	chr17	600735	11786951
					Monosomy	0.7291	chrX	NA	NA
NA20759	TSI	European	Male	LCL	Mitotic Trisomy	0.265	chr12	NA	NA	BGI	108
NA20832	TSI	European	Female	LCL	Monosomy	0.4261	chrX	NA	NA	WUGSC	45
NA20869	GIH	South Asian	Female	LCL	LOH	0.2357	chr22	17589297	23403976	BI	81
NA21118	GIH	South Asian	Male	LCL	Monosomy	0.102	chr19	NA	NA	BCM	56	Figure S6h
					Mitotic Trisomy	0.114	chr5	NA	NA
GBR	British in England and Scotland						LCL	Lymphoblastoid cell line
FIN	Finnish in Finland						LOH	Loss of heterozygosity
CHS	Southern Han Chinese						NA	Not applicable
PUR	Puerto Ricans from Puerto Rico						StartPos/EndPos	Start and end positions of LOH, GRCh38/hg38
CLM	Colombians from Medellin, Colombia
IBS	Iberian Population in Spain						BGI	Bejing Genomics Institute
PEL	Peruvians from Lima, Peru						BCM	Baylor College of Medicine
ACB	African Caribbeans in Barbados						BI	The Broad Institute
CDX	Chinese Dai in Xishuangbanna, China						WUGSC	Washington University Genome Science Center
GWD	Gambian in Western Divisions in the Gambia
MSL	Mende in Sierra Leone
ESN	Esan in Nigeria
BEB	Bengali from Bangladesh
CEU	Utah Residents (CEPH) with Northern and Western European Ancestry
YRI	Yoruba in Ibadan, Nigeria
CHB	Han Chinese in Bejing, China
JPT	Japanese in Tokyo, Japan
LWK	Luhya in Webuye, Kenya
MXL	Mexican Ancestry from Los Angeles USA
ASW	Americans of African Ancestry in SW USA
TSI	Toscani in Italia
GIH	Gujarati Indian from Houston, Texas
